# Supplementary material for: Measuring the Emergence of Specific Abilities in Young Children with Autism Spectrum Disorders: The Example of Early Hyperlexic Traits
Source: MDPI journal article supplement (doi:10.3390/brainsci11060692), 2021-05-25
Supplement: s1 [file s1]

**Table S1.** Group differences regarding the hyperlexic trait score, autism symptoms, developmental and adaptive measures.

|                        |                    | Group    | Median  | IQR    | Pairwise Comparison      | U       | z      | p        | r     |
|------------------------|--------------------|----------|---------|--------|--------------------------|---------|--------|----------|-------|
| Hyperlexic trait score |                    | ASD-eHPL | 0       | 0      | ASD-eHPL<br>vs. ASD+eHPL | -88.175 | -7.276 | <.001*** | -.533 |
|                        |                    | ASD+eHPL | 6       | 2      | ASD-eHPL<br>vs. TD       | -2.215  | -.255  | 1.000    | -.019 |
|                        |                    | TD       | 0       | 0      | ASD+eHPL<br>vs. TD       | 85.960  | 6.141  | <.001*** | .451  |
| ADOS                   | SA                 | ASD-eHPL | 7       | 3      | ASD-eHPL<br>vs. ASD+eHPL | 828     | -1.002 | .316     | -.080 |
|                        |                    | ASD+eHPL | 5.500   | 4      |                          |         |        |          |       |
|                        | RRB                | ASD-eHPL | 9       | 2      | ASD-eHPL<br>vs. ASD+eHPL | 661     | -2.182 | .029*    | -.175 |
|                        |                    | ASD+eHPL | 10      | 1      |                          |         |        |          |       |
|                        | Total              | ASD-eHPL | 8       | 4      | ASD-eHPL<br>vs. ASD+eHPL | 941     | -.292  | .771     | -.023 |
|                        |                    | ASD+eHPL | 7.500   | 4      |                          |         |        |          |       |
| MSEL                   | Visual Reception   | ASD-eHPL | 74.254  | 30.304 | ASD-eHPL<br>vs. ASD+eHPL | -11.086 | -.912  | 1.000    | -.006 |
|                        |                    | ASD+eHPL | 71.982  | 41.074 | ASD-eHPL<br>vs. TD       | -64.586 | -6.576 | <.001*** | -.436 |
|                        |                    | TD       | 125.645 | 30.993 | ASD+eHPL<br>vs. TD       | -53.500 | -3.682 | .001**   | .025  |
|                        | Fine Motor         | ASD-eHPL | 70.246  | 23.967 | ASD-eHPL<br>vs. ASD+eHPL | -15.911 | -1.309 | .572     | -.108 |
|                        |                    | ASD+eHPL | 77.118  | 22.086 | ASD-eHPL<br>vs. TD       | -64.663 | -6.584 | <.001*** | -.541 |
|                        |                    | TD       | 99.185  | 13.978 | ASD+eHPL<br>vs. TD       | -48.752 | -3.355 | .002**   | .276  |
|                        | Receptive Language | ASD-eHPL | 42.611  | 45.318 | ASD-eHPL<br>vs. ASD+eHPL | -22.861 | -1.892 | .175     | -.013 |
|                        |                    | ASD+eHPL | 55.592  | 54.211 | ASD-eHPL<br>vs. TD       | -70.566 | -7.228 | <.001*** | -.049 |

|         |                          |          |         |        |                                 |         |        |          |       |
|---------|--------------------------|----------|---------|--------|---------------------------------|---------|--------|----------|-------|
|         |                          | TD       | 117.535 | 21.957 | ASD+eHPL<br><i>vs.</i> TD       | -47.705 | -3.305 | .003**   | -.022 |
|         | Expressive Language      | ASD-eHPL | 42.322  | 29.928 | ASD-eHPL<br><i>vs.</i> ASD+eHPL | -42.848 | -3.548 | .001**   | -.292 |
|         |                          | ASD+eHPL | 64.868  | 32.124 | ASD-eHPL<br><i>vs.</i> TD       | -72.900 | -7.336 | <.001*** | -.603 |
|         |                          | TD       | 98.442  | 31.825 | ASD+eHPL<br><i>vs.</i> TD       | -30.052 | -2.064 | .117     | -.170 |
| PEP-3   | Visual-Motor Imitation   | ASD-eHPL | 9       | 10     | ASD-eHPL<br><i>vs.</i> ASD+eHPL | -19.864 | -1.326 | .554     | -.097 |
|         |                          | ASD+eHPL | 11      | 9      | ASD-eHPL<br><i>vs.</i> TD       | -68.076 | -6.334 | <.001*** | -.466 |
|         |                          | TD       | 17      | 3      | ASD+eHPL<br><i>vs.</i> TD       | -48.212 | -2.786 | .016*    | -.205 |
| VABS-II | Communication skills     | ASD-eHPL | 71      | 17     | ASD-eHPL<br><i>vs.</i> ASD+eHPL | -31.418 | -2.069 | .116     | -.059 |
|         |                          | ASD+eHPL | 79      | 14     | ASD-eHPL<br><i>vs.</i> TD       | -83.106 | -7.777 | <.001*** | -.578 |
|         |                          | TD       | 110     | 19     | ASD+eHPL<br><i>vs.</i> TD       | -51.688 | -2.958 | .009**   | -.220 |
|         | Receptive Communication  | ASD-eHPL | 9       | 4      | ASD-eHPL<br><i>vs.</i> ASD+eHPL | -15.208 | -1.006 | .944     | -.075 |
|         |                          | ASD+eHPL | 11      | 5      | ASD-eHPL<br><i>vs.</i> TD       | 80.899  | -7.601 | <.001*** | -.565 |
|         |                          | TD       | 17      | 3      | ASD+eHPL<br><i>vs.</i> TD       | -65.691 | -3.775 | <.001*** | -.281 |
|         | Expressive Communication | ASD-eHPL | 9       | 3      | ASD-eHPL<br><i>vs.</i> ASD+eHPL | -34.561 | -2.288 | .066     | -.170 |
|         |                          | ASD+eHPL | 11      | 2      | ASD-eHPL<br><i>vs.</i> TD       | -89.309 | -8.401 | <.001*** | -.624 |
|         |                          | TD       | 17      | 3      | ASD+eHPL<br><i>vs.</i> TD       | -54.748 | -3.150 | .005     | -.234 |

|                       |          |     |    |                                 |         |        |          |       |
|-----------------------|----------|-----|----|---------------------------------|---------|--------|----------|-------|
| Written Communication | ASD-eHPL | 3   | 6  | ASD-eHPL<br><i>vs.</i> ASD+eHPL | -23.288 | -2.822 | .014*    | -.031 |
|                       | ASD+eHPL | 6   | 3  | ASD-eHPL<br><i>vs.</i> TD       | -7.638  | -.926  | 1.000    | -.100 |
|                       | TD       | 3   | 10 | ASD+eHPL<br><i>vs.</i> TD       | 15.650  | 1.441  | .449     | .156  |
| Daily Living skills   | ASD-eHPL | 82  | 20 | ASD-eHPL<br><i>vs.</i> ASD+eHPL | -.240   | -.016  | 1.000    | -.001 |
|                       | ASD+eHPL | 85  | 17 | ASD-eHPL<br><i>vs.</i> TD       | -75.328 | -7.048 | <.001*** | -.524 |
|                       | TD       | 104 | 15 | ASD+eHPL<br><i>vs.</i> TD       | -75.088 | -4.297 | <.001*** | -.319 |
| Socialization skills  | ASD-eHPL | 76  | 11 | ASD-eHPL<br><i>vs.</i> ASD+eHPL | -6.897  | -.454  | 1.000    | -.034 |
|                       | ASD+eHPL | 78  | 14 | ASD-eHPL<br><i>vs.</i> TD       | -87.004 | -8.143 | <.001*** | -.605 |
|                       | TD       | 100 | 13 | ASD+eHPL<br><i>vs.</i> TD       | -80.107 | -4.586 | <.001*** | -.341 |
| Motor skills          | ASD-eHPL | 85  | 17 | ASD-eHPL<br><i>vs.</i> ASD+eHPL | -12.139 | -.800  | 1.000    | -.059 |
|                       | ASD+eHPL | 90  | 16 | ASD-eHPL<br><i>vs.</i> TD       | -52.078 | -4.877 | <.001*** | -.363 |
|                       | TD       | 96  | 8  | ASD+eHPL<br><i>vs.</i> TD       | -39.939 | -2.288 | .066     | -.170 |

\*p < .05; \*\*p < .01; \*\*\*p < .001
